# Supplementary material for: Chemical Labeling Assisted Detection and Identification of Short Chain Fatty Acid Esters of Hydroxy Fatty Acid in Rat Colon and Cecum Contents
Source: MDPI journal article supplement (doi:10.3390/metabo10100398), 2020-10-08
Supplement: s1 [file s1]

**Figure S1:**

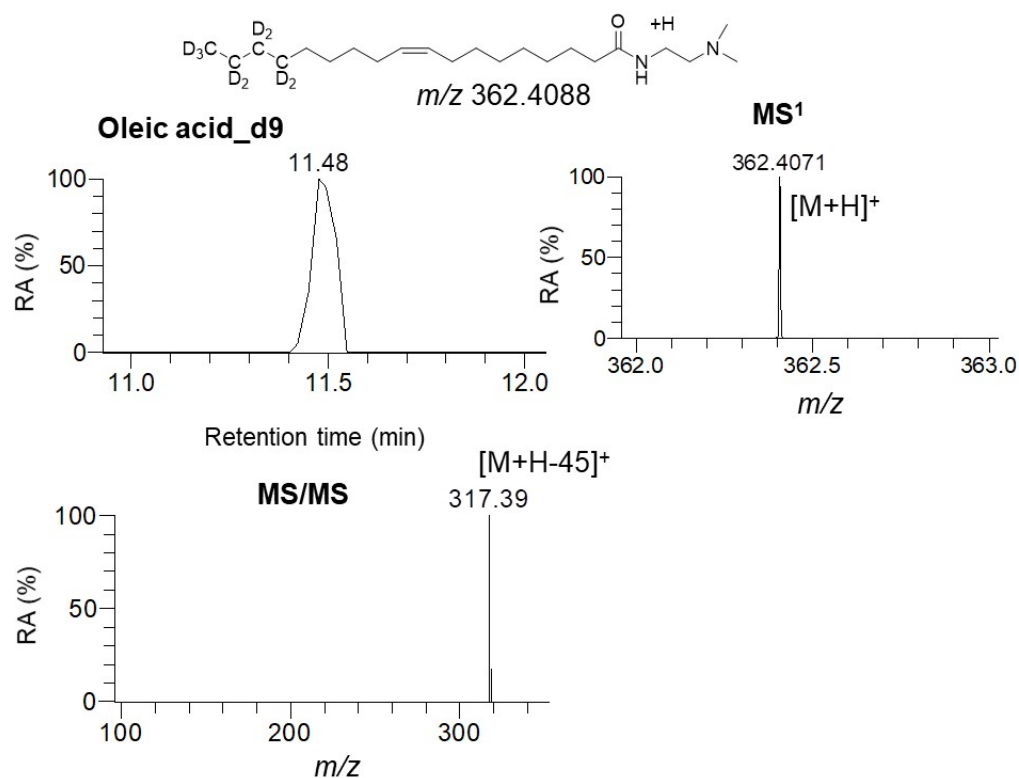

**Figure S1:** Extracted ion chromatogram and mass spectra of internal standard oleic acid-d9

**Figure S2:**

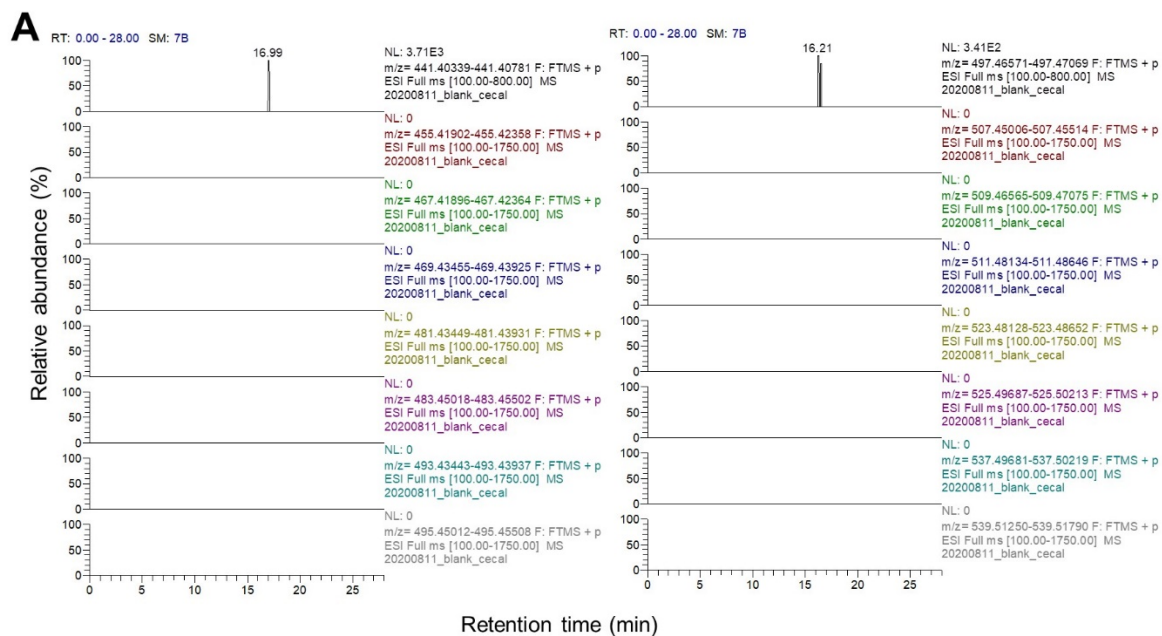

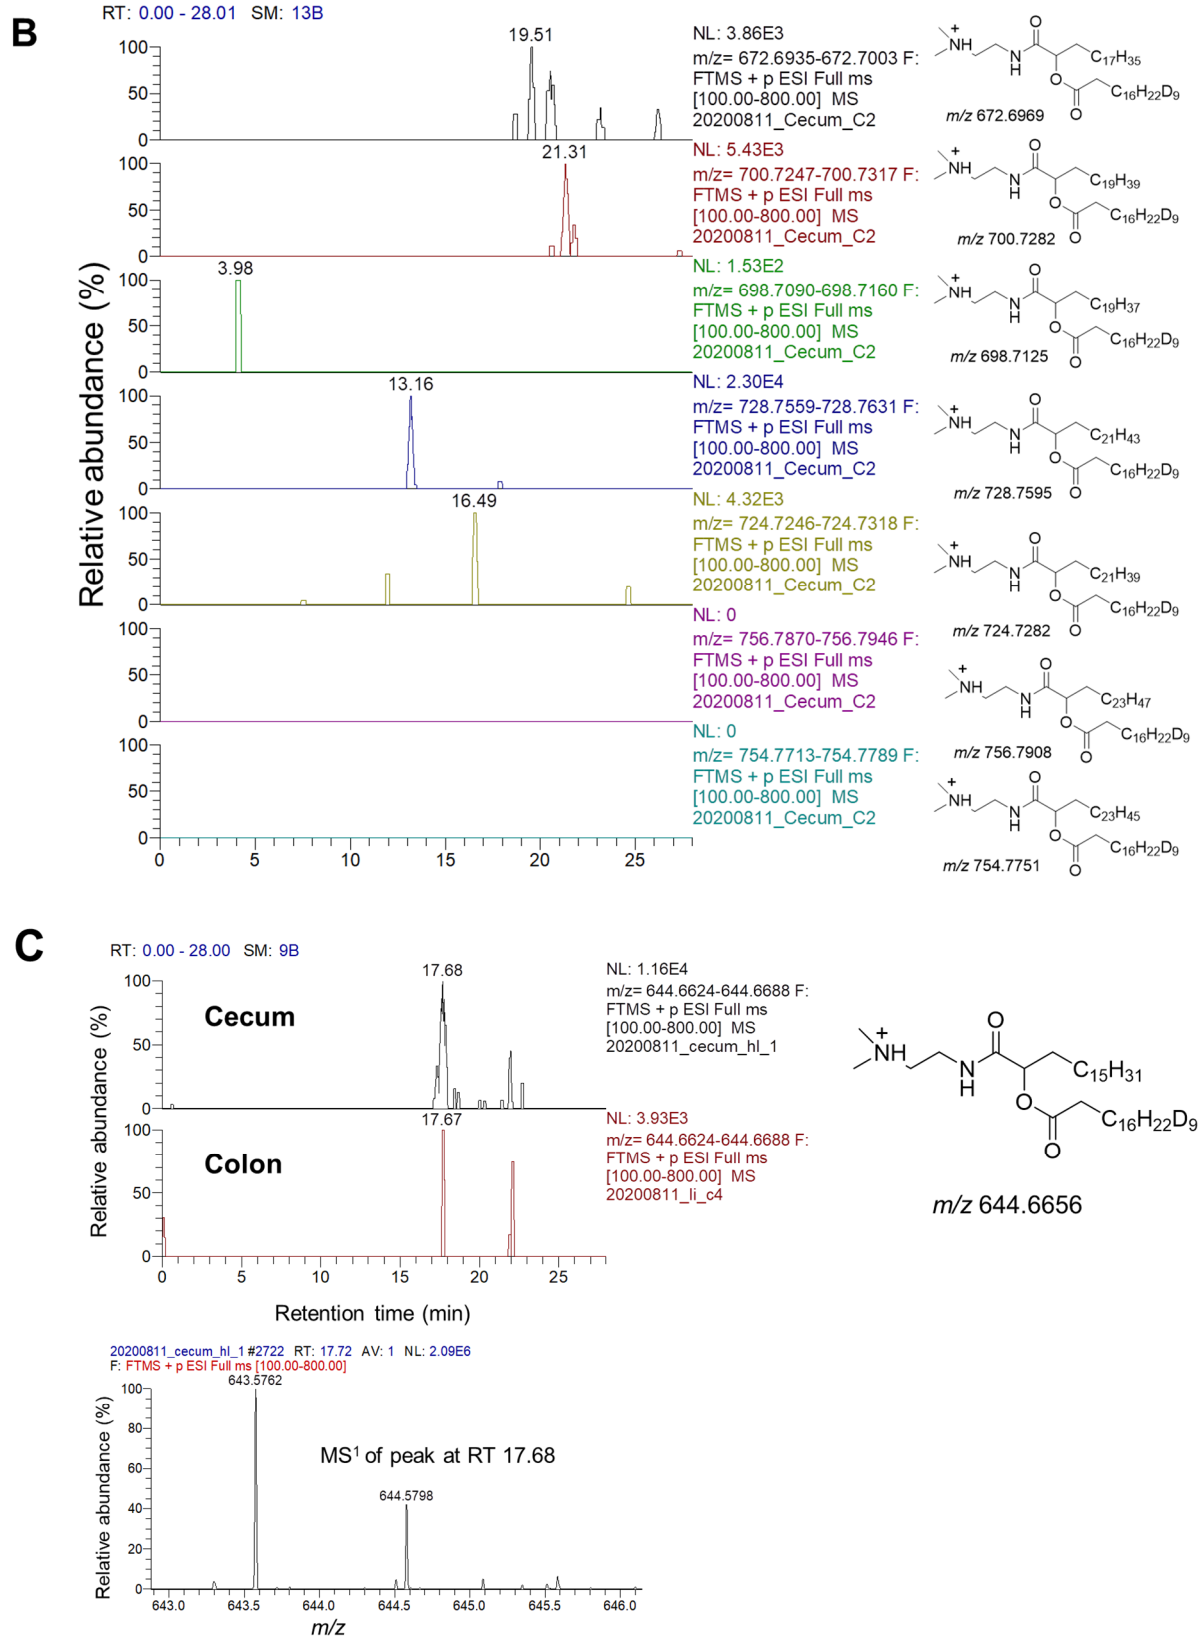

**Figure S2:** Extracted ion chromatograms **A.** SFAHFAs in blank **B.** Anticipated oleic acid-d<sub>9</sub> esterified hydroxy fatty acid FAHFAs in sample **C.** Anticipated oleic acid-d<sub>9</sub> esterified hydroxy stearic acid FAHFAs in sample.

Figure S3:

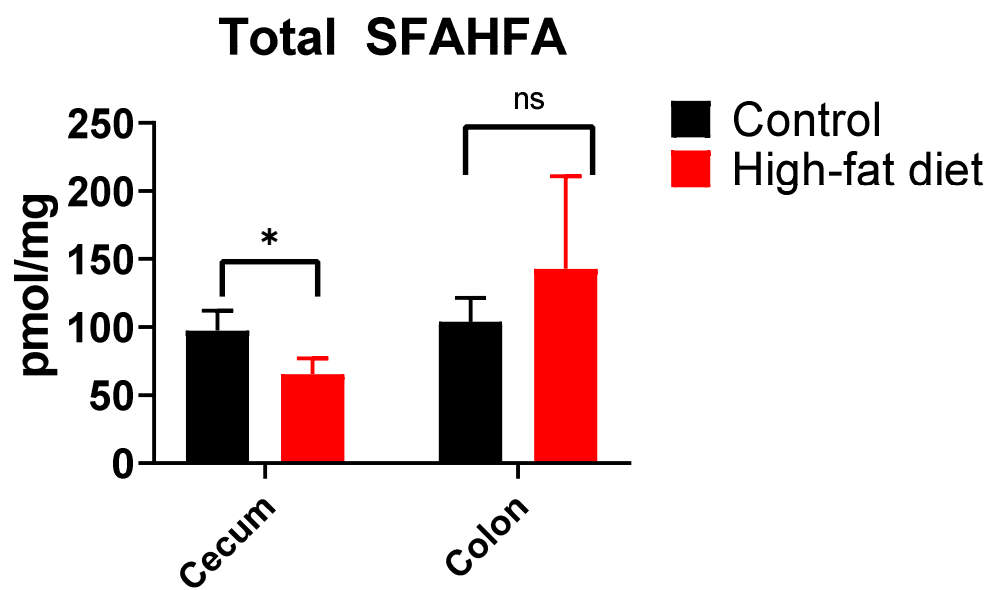

Figure S3: Total SFAHFAs comparison between colon and cecum contents.
